# Supplementary material
Source: PubMed Central journal article supplement (PMC10646152)
Supplement: NIHMS1916954-supplement-1.pdf [file NIHMS1916954-supplement-1.pdf]

# SUPPLEMENTARY INFORMATION

## Replicable Patterns of Memory Impairments in Children With Autism and Their Links To Hyperconnected Brain Circuits

Liu *et al.*

**I. Supplementary Methods** .... Pages 2-3.

**II. Supplementary Results** .... Pages 4-5.

**III. Supplementary Tables** .... Pages 6-19.

Table S1. Summary of previous studies of episodic memory in children with ASD.

Table S2. Number of participants included in each analysis.

Table S3. Linear mixed model results of general memory (WRAML2).

Table S4. ANOVA results of general and face memory (NEPSY-II).

Table S5. Correlation between memory measures in the ASD group.

Table S6. Correlation between memory measures in the TD group.

Table S7. 19 validation indices from hierarchical clustering analysis in the ASD group.

Table S8. 19 validation indices from hierarchical clustering analysis in the TD group.

Table S9. Brain regions that showed hyper-functional connectivity of the left and right hippocampus in ASD, compared to TD control, group.

Table S10. SVR prediction of general and face memory with hippocampal or PCC connectivity.

Table S11. Definition of regions of interest (ROI).

Table S12. Brain regions that showed hyper-functional connectivity of the PCC in ASD, compared to TD control, group.

**IV. Supplementary Figures** .... Pages 20-23.

Figure S1. Episodic memory assessments using WRAML2 and NEPSY-II.

Figure S2. Flow chart showing the search of an open-source autism spectrum disorder dataset.

Figure S3. Surface rendering of regions of interest (ROI) used in functional connectivity analysis.

Figure S4. Dendrogram from hierarchical clustering of episodic memory in TD children.

**V. Supplementary References** .... Page 24.

## I. Supplementary Methods

### Participants

All children were right-handed or ambidextrous, had full-scale intelligence quotient (IQ) scores above 80 based on the Wechsler Abbreviated Scale of Intelligence (WASI) (1), and had no history of claustrophobia or head injury. The inclusion criteria for TD children included no personal and family history of genetic, neurological, psychiatric, or developmental cognitive disorders.

### Memory assessments

For standardized episodic memory assessments, we used Wide Range Assessment of Memory and Learning, Second Edition (WRAML2) (2) and A Developmental NEuroPSYchological Assessment, Second Edition (NEPSY-II) (3). Details of each subtest for WRAML2 and NEPSY-II are described below.

**WRAML2.** Four subtests from core battery (*verbal learning, story memory, design memory, picture memory*), two corresponding subtests from optional delayed subtests (*delayed verbal learning, delayed story memory*), and four corresponding subtests from optional recognition subtests (*delayed verbal learning recognition, delayed story recognition, delayed design recognition, delayed picture recognition*) were administered. In *verbal learning* subtest, children were asked to recall initially related common nouns after four repeated trials. In *story memory* subtest, children recalled meaningful verbal information from two stories. In *design memory* subtest, children were instructed to draw an array of geometric shapes shown in card after reviewing the card. In *picture memory* subtest, children recalled information presented in four picture scenes. Approximately 20 minutes after the core battery subtests, *delayed verbal learning* and *delayed story memory* subtests were administered in which children recalled the information presented previously. The recognition subtests, *delayed verbal learning recognition, delayed story recognition, delayed design recognition, delayed picture recognition*, were then administered with a forced-choice format including previously presented contents.

**NEPSY-II.** Two subtests, *memory for faces* and *memory for designs*, were administered. In the *memory for faces* subtest, children were first asked to identify the gender of children's faces in a series of 16 trials. Then, they were asked to determine which of the three faces they have seen earlier. In *memory for designs* subtest, children first reviewed the content and position of cards placed on two-dimensional grids and were then asked to select the designs from a set of cards and to place the cards in the same location as they were previously shown. Approximately 15-25 minutes after *memory for faces* and *memory for designs* subtests, delayed versions of these subtests were administered.

### Replication analysis with NDA cohort data

We launched a search of a publicly-available open-source dataset, the National Institute of Mental Health Data Archive (NDA; <https://nda.nih.gov/>). We first searched participants with WRAML2 and NEPSY-II available through NDA. None of the participants had both WRAML2 and NEPSY-II memory scores relevant to assessments of general and face memory, respectively,

suggesting the uniqueness of our datasets. Then, we searched participants with available relevant memory scores of either WRAML2 or NEPSY-II and identified two cohorts with memory subtests of WRAML2 or NEPSY-II (**Figure S2**). None of these cohorts had resting-state fMRI brain data available.

### **Correlation analysis with IQ**

We examined relation between general and face memory scores with IQ by using Pearson's correlation.

### **Brain imaging analysis**

**fMRI data acquisition.** Brain images were acquired on a 3T GE Signa scanner (General Electric, Milwaukee, WI) using a custom-built head coil at the Lucas Center of Stanford University. Children were required to keep eyes closed and remain still during the resting scan. A T2\* weighted gradient echo spiral in-out pulse sequence (4) was acquired for each child. Additional

**Regions of interest (ROIs).** In addition to the hippocampus and PPC ROIs described in the main text, we examined functional connectivity of several control ROIs, including brain regions implicated in episodic memory, including the prefrontal cortex and posterior parietal cortex (5), including the fusiform face area (6), amygdala (7), and temporoparietal junction (8) (see **Figure S3** and **Table S9**).

**Functional connectivity analysis.** Voxel-wise whole-brain functional connectivity analysis was performed for the hippocampus and PCC as seed regions of interest (ROIs), as well as control seed ROIs, as described below. The ROIs were constructed by drawing spheres with centers as the seed point and a radius of 6 mm.

**Multivariate brain-behavior association analysis.** For each ROI, functional connectivity estimated of all voxels that showed significant connectivity differences between TD and ASD groups were concatenated to generate a feature vector. Support vector regression (SVR) analysis was then performed to predict face and general memory deficits. Prediction performance was evaluated using leave-one-out cross-validation (LOOCV). Specifically, in each LOOCV fold, data from one child was designated as the test sample, while data from the remaining children were used as the training set in the SVR analysis. Connectivity features were normalized by subtracting the mean value and dividing it by standard deviation across children in the training set. This procedure was also used for normalizing the test sample in the prediction analysis. Each child was set as the test sample once. After completing all LOOCV folds, final prediction accuracy was estimated by computing the correlation coefficient between the predicted scores and the observed scores across folds.

**Control analysis.** To examine the specificity of our findings with respect to memory deficits, we conducted additional control analysis using matrix reasoning subtest of Wechsler Abbreviated Scale of Intelligence (WASI). This subtest uses similar visual stimuli (shapes, designs etc.) as the visual memory tasks, but without memory demands.

## II. Supplementary Results

### Demographic information

*Race and ethnicity.* Among children with autism, 44% were White/Caucasian, 12% Black/African American, 4% American Indian/Alaska Native, 4% Asian, 12% Other, and 24% were Unknown/Declined to report. Additionally, 24% were Hispanic or Latino. Among TD children, 65% were White/Caucasian, 3% American Indian/Alaska Native, 7% Asian, 17% Other, and 7% Unknown/Declined to report. Additionally, 28% of participants reported as Hispanic or Latino.

*Gross annual household income.* Among children with autism, 4% of their parents reported to have income below \$50,000, 8% between \$50,000 - \$75,000, 16% between \$100,000-\$150,000, 16% between \$150,000-\$200,000, 28% over \$200,000, and 28% unknown/decline to report. Among TD children, 7% of their parents reported to have income between below \$50,000, 3% between \$50,000 - \$75,000, 3% between \$50,000 - \$75,000, 20% between \$75,000 - \$100,000, 24% between \$100,000-\$150,000, 10% between \$150,000-\$200,000, 20% over \$200,000, and 13% unknown/decline to report.

*Father's education.* Among children with autism, 4% of their father reported to have education level of partial high school, 4% high school graduate, 20% partial college, 24% college graduate, 36% graduate degree, and 12% unknown/decline to report. Among TD children, 10% of their father reported to have education level of high school graduate, 14% partial college, 31% college graduate, 35% Graduate degree, and 10% unknown/decline to report.

*Mother's education.* Among children with autism, 4% of their father reported to have education level of partial high school, 12% high school graduate, 20% partial college, 32% college graduate, 20% graduate degree, and 12% unknown/decline to report. Among TD children, 7% of their father reported to have education level of partial high school, 7% high school graduate, 14% partial college, 21% college graduate, 45% graduate degree, and 6% unknown/decline to report.

### Results of hierarchical clustering analysis in TD children

Hierarchical clustering analysis revealed that no single cluster had all general memory measures in TD children. Here, we observed four and eight cluster solutions with equal number of recommendations ( $n = 6$ ; **Table S8**). In the four-cluster solution, visual, verbal, and design memory measures formed three separate clusters along with one cluster with face memory measures (**Figure 2D, bottom**). In the eight-cluster solution, all subscores from WRAML2 and NEPSY-II were identified as distinct clusters (**Figure S4**). These findings indicate modality- and task-specific memory structure in the TD group that is not observed in the ASD group.

### Replication NDA datasets

*i)* NDA WRAML-child cohort included 22 children with ASD and 24 TD children. Two children groups were matched with gender (19 boys in ASD and 23 boys in TD;  $\chi^2 = 1.30$ ;  $p = 0.255$ ), age (range 8-13;  $t(44) = -1.14$ ,  $p = 0.262$ ), and IQ (ASD:  $107 \pm 16$ ; TD:  $108 \pm 11$ ;  $t(44) = -0.41$ ,  $p =$

0.681). The available data of WRAML2 included story memory, word learning, design memory, picture memory, and sentence memory subtests. The screen memory index representing total memory performance was provided. This index showed that children with ASD had worse performances in general on WRAML than TD children, as described in main text (**Figure 3**).

*ii*) NDA NEPSY-child cohort included only 42 children with ASD. For comparisons, we used the TD group from Stanford cohort. These groups were matched with gender (33 boys in ASD and 23 boys in TD;  $\chi^2 = 0.13$ ;  $p = 0.714$ ), age (range 7-13;  $t(68) = 1.51$ ,  $p = 0.137$ ), and IQ (measured by averaged VIQ and PIQ scores; ASD:  $118 \pm 9$ ; TD:  $122 \pm 16$ ;  $t(68) = -1.51$ ,  $p = 0.135$ ). The available data of NEPSY-II for children with ASD included face immediate memory and face delayed memory subtests. We generated a composite face memory score by averaging face memory and face delayed memory scores. As described in the main text (**Figure 3**), significant group differences were found on this face memory score, with ASD showing compromised performances compared to TD children.

### **Correlation between IQ and general and face memory deficits in children ASD**

We found that full-scale IQ scores was significant correlated with general memory deficits ( $r = 0.54$ ,  $p = 0.009$ ) but not face memory deficits ( $r = -0.13$ ,  $p = 0.577$ ) in children with ASD.

### **Functional connectivity of control region cannot predict general memory deficits in children with ASD**

We examined whether aberrant patterns of prefrontal cortex (PFC) and posterior parietal cortex (PPC), implicated in episodic memory, predict general memory deficits in children with ASD. Results from these analyses showed that functional connectivity of PFC ( $p_{\text{corrected}} = 0.152$ ) or PPC ( $p_{\text{corrected}} = 0.824$ ) cannot predict general memory deficits in children with ASD.

### **Functional connectivity of control region cannot predict face memory deficits in children ASD**

We examined whether abnormal functional connectivity of regions associated with face cognition, including fusiform face area (FFA), amygdala (AMY), and temporoparietal junction (TPJ) can predict face memory deficits in children with ASD. Results from SVR analysis showed that connectivity pattern of FFA ( $p_{\text{corrected}} > 0.99$ ), AMY ( $p_{\text{corrected}} > 0.99$ ), or TPJ ( $p_{\text{corrected}} > 0.99$ ) cannot predict face memory deficits in children with ASD.

### III. Supplementary Tables

**Table S1. Summary of previous studies of episodic memory in children with autism spectrum disorder (ASD).**

| Study                          | Age   | IQ                  | Sample Size |           | Short-term Memory |        |             |         | Long-term Memory |        |             |         | Brain imaging Method |        |  |
|--------------------------------|-------|---------------------|-------------|-----------|-------------------|--------|-------------|---------|------------------|--------|-------------|---------|----------------------|--------|--|
|                                |       |                     |             |           | Recall            |        | Recognition |         | Recall           |        | Recognition |         |                      |        |  |
|                                |       |                     |             |           | Visual            | Verbal | Visual      |         | Verbal           | Visual | Verbal      | Visual  |                      | Verbal |  |
|                                |       |                     |             |           |                   |        | General     | Face    |                  |        |             | General |                      | Face   |  |
| Abbasy et al. (9)              | 7-11  | 91±23               | 1540(1020)  | 1490(970) | ↓                 |        |             |         |                  |        |             |         |                      | n.a.   |  |
| Alloway et al. (10)            | 4-14  | 79±18*              | 26(23)      | 23(12)    | ↓                 | ↓      |             |         |                  |        |             |         |                      | n.a.   |  |
| Almeida et al. (11)            | 6-15  | >90                 | 27(23)      | 32(18)    |                   |        |             |         |                  | n.s.   |             |         |                      | n.a.   |  |
| Anns et al. (12)               | 6-11  | 105±12              | 26(n.a.)    | 32(n.a.)  | n.s.              |        | ↓           |         |                  |        |             |         |                      | n.a.   |  |
| Bigham et al. (13)             | 6-14* | 94±18 <sup>κ</sup>  | 18(10)      | 29(21)    | ↓                 |        | n.s.        |         |                  |        |             |         |                      | n.a.   |  |
| Boucher et al. (14)            | 8-18  | n.a. <sup>^</sup>   | 12(10)      | 12(10)    | n.s.              | ↓      |             |         | ↓                |        |             |         |                      | n.a.   |  |
| Boucher et al. (15)            | 10-16 | n.a.                | 10(10)      | 10(10)    |                   |        |             |         |                  | ↓      |             |         |                      | n.a.   |  |
| Boucher et al. (16)            | 10-16 | n.a. <sup>+^</sup>  | 10(10)      | 10(10)    |                   |        |             | ↓       |                  |        |             |         |                      | n.a.   |  |
| Brezis et al. (17)             | 8-18  | 110±3               | 32(28)      | 30(23)    |                   |        |             |         |                  |        | n.s./ ↓     |         |                      | n.a.   |  |
| Buitelaar et al. (18)          | 8-18  | 102±19              | 20(18)      | 20(13)    | n.s.              | n.s.   |             |         |                  |        |             |         |                      | n.a.   |  |
| Chen et al. (19)               | 8-12* | 109±16*             | 53(48)      | 63(58)    | ↓                 | ↓      |             |         |                  |        |             |         |                      | n.a.   |  |
| Cook et al. (20)               | 8-15  | 114±13              | 12(3)       | 19(5)     |                   |        |             |         |                  |        | n.s.        |         |                      | tfMRI  |  |
| Corbett et al. (21)            | 8-12  | 101±19*             | 34(34)      | 32(32)    |                   |        |             | ↓       |                  |        |             | ↓       |                      | n.a.   |  |
| Croydon et al. (22)            | 7-12  | 99±15 <sup>κ</sup>  | 44(35)      | 44(33)    |                   |        |             | ↓       |                  |        |             |         |                      | n.a.   |  |
| Cui et al. (23)                | 6-9   | 100±17              | 12(11)      | 29(24)    | ↓                 | ↑      |             |         |                  |        |             |         |                      | n.a.   |  |
| Diehl et al. (24)              | 6-14  | 104±14              | 17(13)      | 17(12)    |                   | n.s.   |             |         |                  |        |             |         |                      | n.a.   |  |
| Farrant et al. (25)            | 8-16  | n.a.                | 15(14)      | 15(13)    |                   |        |             |         | n.s.             |        |             |         |                      | n.a.   |  |
| Farrant et al. (26)            | 8-15  | n.a.                | 12(11)      | 12(10)    | n.s.              |        |             |         |                  |        |             |         |                      | n.a.   |  |
| Fedor et al. (27) <sup>3</sup> | 7-12  | 113±13              | 25(21)      | 29(23)    |                   |        |             | n.s.    |                  |        |             |         |                      | n.a.   |  |
| Gabig et al. (28)              | 5-8   | 95±11 <sup>#*</sup> | 15(13)      | 10(n.a.)  |                   | ↓      |             |         |                  |        |             |         |                      | n.a.   |  |
| Geurts et al. (29)             | 6-13  | 98±18*              | 41(n.a.)    | 41(n.a.)  | ↓                 |        |             |         |                  |        |             |         |                      | n.a.   |  |
| Grainger et al. (30)           | 13±1  | 107±12              | 22(19)      | 20(20)    |                   |        |             |         |                  | n.s.   |             |         | n.s.                 | n.a.   |  |
| Grainger et al. (31)           | 14±1  | 101±14              | 22(19)      | 21(19)    |                   |        |             |         |                  | n.s.   |             |         |                      | n.a.   |  |
| Greimel et al. (32)            | 9-19  | 108±14              | 13(13)      | 13(13)    |                   |        | n.s.        |         |                  |        |             |         |                      | tfMRI  |  |
| Gunji et al. (33)              | 8±1   | 83±15               | 9(9)        | 9(9)      |                   |        |             | n.s./ ↓ |                  |        |             |         |                      | EEG    |  |
| Hartley et al. (34)            | 5-16* | 86±18 <sup>#*</sup> | 16(13)      | 16(6)     |                   |        |             |         |                  |        | n.s.        |         |                      | n.a.   |  |
| Hashimoto et al. (35)          | 7-16  | >70                 | 41(29)      | 82(58)    |                   |        | n.s.        |         |                  |        | n.s.        |         |                      | rfMRI  |  |
| Henderson et al. (36)          | 8-16  | >70                 | 31(28)      | 31(22)    |                   |        |             |         |                  |        |             |         | n.s.                 | n.a.   |  |
| Henry et al. (37)              | 6-11* | >70*                | 71(62)      | 199(98)   |                   |        |             |         |                  | n.s.   |             |         |                      | n.a.   |  |
| Jiang et al. (38)              | 7-15  | 107±19 <sup>#</sup> | 20(18)      | 20(17)    |                   |        |             |         |                  |        | n.s.        | n.s.    |                      | n.a.   |  |
| Kurz et al. (39)               | 9-12  | 109±2               | 21(21)      | 21(20)    |                   |        |             |         |                  | ↓      | ↓           | ↓       |                      | n.a.   |  |
| Li et al. (40)                 | 8-16  | 101±12              | 20(19)      | 20(19)    |                   |        | ↓           |         |                  |        |             |         |                      | n.a.   |  |
| Lind & Bowler (41)             | 9±2   | 80±13 <sup>#</sup>  | 53(45)      | 50(35)    |                   |        |             |         | ↓                |        | n.s.        |         |                      | n.a.   |  |
| Lind et al. (42)               | 6-12  | 106±16              | 20(16)      | 20(15)    |                   |        |             |         |                  | ↓      | n.s.        |         |                      | n.a.   |  |
| Lind et al. (43)               | 13±2  | 105±10              | 26(19)      | 26(18)    |                   |        |             | n.s.    |                  |        |             |         |                      | n.a.   |  |
| Lopez et al. (44)              | 13±2  | 87±25               | 15(n.a.)    | 16(n.a.)  | ↓                 |        |             | n.s.    |                  |        |             |         |                      | n.a.   |  |

|                                    |              |                                |                |          |        |      |        |      |      |        |      |        |      |       |
|------------------------------------|--------------|--------------------------------|----------------|----------|--------|------|--------|------|------|--------|------|--------|------|-------|
| Loth et al. (45)                   | <b>8-15*</b> | 108±21                         | 25(25)         | 20(20)   | ↓      |      |        |      |      |        |      |        |      | n.a.  |
| Lucas et al. (46)                  | <b>7-12</b>  | n.a.                           | 20(15)         | 21(12)   |        |      | n.s.   |      |      |        |      | n.s.   |      | n.a.  |
| Loveland et al. (47)               | <b>7-18</b>  | 81±27                          | 80(n.a.)       | 58(n.a.) |        |      | n.s.   | n.s. |      |        |      | ↓      |      | n.a.  |
| Lynn et al. (48) <sup>1</sup>      | 7-12         | 111±11                         | 13(n.a.)       | 13(n.a.) |        |      | n.s.   | n.s. |      |        |      |        |      | tfMRI |
| Ma et al. (49)                     | 12±2         | <b>n.a.</b>                    | 19(18)         | 19(18)   | ↓      |      |        |      |      |        |      |        |      | n.a.  |
| Macizo et al. (50)                 | 5-13         | <b>104±4*</b>                  | 20(14)         | 20(17)   | n.s.   | n.s. |        |      |      |        |      |        |      | n.a.  |
| Maister et al. (51)                | 8-13         | n.a. <sup>#</sup>              | 15(15)         | 15(11)   |        |      | n.s.   | n.s. |      |        |      | n.s.   |      | n.a.  |
| Maister et al. (52)                | 11-13        | <b>n.a.</b>                    | 14(14)         | 14(13)   | ↓      | ↓    |        |      |      |        |      | ↓      |      | n.a.  |
| Mammarella et al. (53)             | <b>8-18</b>  | 92±6                           | 17(n.a.)       | 17(n.a.) | ↓/n.s. |      | n.s.   |      |      |        |      |        |      | n.a.  |
| Maski et al. (54)                  | 9-16         | <b>101±13**</b>                | 22(19)         | 20(18)   | ↓      |      |        |      |      |        |      |        |      | n.a.  |
| Matsuura et al. (55)               | 10-15        | 105±14                         | 11(11)         | 19(12)   |        |      | n.s.   |      |      |        |      |        |      | n.a.  |
| Mattison et al. (56)               | <b>15±2*</b> | n.a.                           | 45(n.a.)       | 45(n.a.) |        | ↓    |        |      |      |        |      |        |      | n.a.  |
| Mcgregor et al. (57)               | 11±2         | 108±11                         | 30(n.a.)       | 43(n.a.) |        |      |        |      |      | ↓/n.s. |      |        |      | n.a.  |
| McPartland et al. (58)             | 12-17        | 115±12                         | 15(13)         | 17(13)   |        |      | n.s.   | ↓    |      |        |      |        |      | n.a.  |
| Millward et al. (59)               | <b>11-16</b> | <b>n.a.</b>                    | 12(11)         | 12(10)   |        |      |        |      |      |        |      | ↓      |      | n.a.  |
| Minshew et al. (60)                | <b>12-40</b> | 95±13                          | 21(21)         | 21(21)   |        | ↓    |        |      |      |        |      | ↓      |      | n.s.  |
| Mogensen et al. (61)               | 9-15         | <b>93±17<sup>&amp;^</sup></b>  | 14(12)         | 16(11)   |        |      | ↓      |      |      |        |      |        |      | n.a.  |
| Molesworth et al. (62)             | 8-14         | <b>n.a.</b>                    | 15(15)         | 15(15)   |        |      | n.s.   |      |      |        |      |        |      | n.a.  |
| Mooney et al. (63)                 | 8-12         | <b>101±19*</b>                 | 62(49)         | 72(51)   |        |      | ↓/n.s. |      |      |        |      |        |      | n.a.  |
| Mottron et al. (64)                | <b>11-40</b> | 105±13                         | 14(11)         | 14(9)    |        |      | n.s.   |      |      |        |      |        |      | n.a.  |
| Narzisi et al. (65)                | <b>5-16</b>  | 99±14                          | 22(22)         | 44(44)   |        | ↓    | ↓      | ↓    |      |        |      | ↓      | ↓    | n.a.  |
| O'Hearn et al. (66) <sup>3</sup>   | 9-29         | 100±7                          | 34(31)         | 34(30)   |        |      |        | ↓    |      |        |      |        |      | n.a.  |
| O'Hearn et al. (67)                | 7-12         | 110±11                         | 15(12)         | 15(11)   |        |      | n.s.   | n.s. |      |        |      |        |      | tfMRI |
| O'Shea et al. (68)                 | 8-14         | 96±19                          | 21(17)         | 21(9)    |        | ↓    | n.s.   | ↓    |      |        |      |        |      | n.a.  |
| Parron et al. (69)                 | <b>7-18</b>  | 94±15                          | 23(20)         | 23(20)   |        |      | ↓      | ↓    |      |        |      |        |      | n.a.  |
| Phelan et al. (70) <sup>1</sup>    | 13±2         | 112±14                         | 15(12)         | 15(12)   |        |      | n.s.   |      |      |        |      | n.s.   |      | n.s.  |
| Salmanian et al. (71)              | <b>8-17</b>  | <b>99±12<sup>#*</sup></b>      | 15(n.a.)       | 15(n.a.) | ↓      |      | ↓      |      |      |        |      |        |      | n.a.  |
| Salmond et al. (72)                | <b>8-18</b>  | 102±4 <sup>Ⓚ</sup>             | <b>14(13)*</b> | 18(6)    | ↓      | ↓    | n.s.   | n.s. | n.s. | ↓      | ↓    |        |      | sMRI  |
| Semino et al. (73)                 | 7-12         | 92±12                          | 15(13)         | 15(12)   | ↓/n.s. |      | n.s.   | ↓    |      | n.s.   |      | n.s.   |      | n.a.  |
| Souchay et al. (74)                | 14±2         | 112±15                         | 19(16)         | 19(14)   | n.s.   |      | n.s.   |      |      |        |      |        |      | n.a.  |
| Southwick et al. (75) <sup>2</sup> | <b>5-19</b>  | 110±16 <sup>Ⓚ</sup>            | 36(36)         | 36(36)   | ↓      | ↓    | ↓      | ↓    |      | ↓      | ↓    |        | ↓    | n.a.  |
| Tehrani-Doost et al. (71)          | <b>8-17</b>  | <b>99±12*</b>                  | 15(n.a.)       | 15(n.a.) |        |      |        | n.s. |      |        |      |        | n.s. | n.a.  |
| Tessier et al. (76)                | 6-13         | 117±10                         | 13(13)         | 13(13)   |        |      |        | n.s. |      |        |      | ↓/n.s. |      | EEG   |
| Tewolde et al. (77)                | 6-14         | <b>106±15<sup>^</sup></b>      | <b>30(5)*</b>  | 30(14)   |        |      |        |      | n.s. |        |      |        |      | n.a.  |
| Trontel et al. (78) <sup>2</sup>   | <b>5-19</b>  | <b>108±12*</b>                 | 38(38)         | 31(31)   | ↓      | ↓    | ↓      | ↓    |      | n.s.   | ↓    |        | ↓    | sMRI  |
| Trontel et al. (79) <sup>2</sup>   | <b>5-19</b>  | <b>98±17*</b>                  | 56(56)         | 31(31)   | ↓      | ↓    | ↓      | ↓    |      | ↓      |      |        | ↓    | sMRI  |
| Tsatsanis et al. (80)              | 6-14         | 112±19                         | 29(n.a.)       | 30(n.a.) | n.s.   |      |        |      |      | n.s.   |      |        |      | n.a.  |
| Tyson et al. (81)                  | <b>8-20</b>  | <b>105±14<sup>&amp;^</sup></b> | 44(40)         | 34(31)   |        | ↓    |        |      |      |        |      | n.s.   |      | n.s.  |
| Verte et al. (82)                  | 6-13         | <b>99±17*</b>                  | 61(57)         | 47(40)   | ↓      |      |        |      |      |        |      |        |      | n.a.  |
| Wang et al. (83)                   | <b>6-15</b>  | <b>100±18*</b>                 | 21(20)         | 28(19)   | ↓      |      |        |      |      |        |      |        |      | n.a.  |
| Williams et al. (84)               | <b>8-16</b>  | 104±14                         | 38(n.a.)       | 38(n.a.) | ↓      | ↓    | ↓      |      |      |        |      | ↓      |      | n.a.  |
| Williams et al. (85)               | <b>8-15</b>  | 104±15                         | 56(46)         | 56(39)   | ↓      | n.s. | ↓      |      |      | ↓      |      |        | n.s. | n.a.  |
| Williams et al. (86)               | <b>9-17</b>  | 106±9                          | 47(37)         | 31(25)   |        |      | n.s.   |      |      |        | ↓    |        |      | n.a.  |
| Wojcik et al. (87)                 | <b>8-17</b>  | <b>112±15</b>                  | 18(16)         | 18(13)   |        |      | n.s.   |      |      |        | n.s. |        |      | n.a.  |
| Wojcik et al. (88)                 | <b>9-17</b>  | <b>114±16<sup>^</sup></b>      | 21(18)         | 21(17)   |        |      | n.s.   |      |      |        | n.s. |        |      | n.a.  |
| Zaki et al. (89)                   | <b>9-17</b>  | 112±14                         | 31(27)         | 31(27)   |        |      |        | ↓    |      |        |      |        |      | n.a.  |
| Zhang et al. (90)                  | <b>4-17</b>  | <b>95±19*</b>                  | <b>52(37)*</b> | 32(16)   | ↓      |      |        |      |      |        |      |        |      | n.a.  |

IQ, full-scale Intelligence Quotient; tMRI, task functional Magnetic Resonance Imaging; sMRI, structural Magnetic Resonance Imaging; ↓, ASD < TD ( $p < 0.05$ ); ↑, ASD > TD ( $p < 0.05$ ); ↓, ASD < TD ( $p < 0.10$ ); n.s., not significant; n.a. not available.

\* intelligence quotient (IQ) was not matched between ASD and TD groups

# nonverbal IQ (NVIQ) was reported and verbal IQ (VIQ) not reported

& VIQ was reported and NVIQ not reported

^ VIQ was not matched between ASD and TD groups

+ Standard scores of IQ not reported

<sup>1-3</sup> sample overlapped between studies



**Table S2. Number of participants included in each analysis.**

|                                           | <b>N<sub>ASD</sub></b> | <b>N<sub>TD</sub></b> |
|-------------------------------------------|------------------------|-----------------------|
| <b>Behavioral analysis</b>                |                        |                       |
| General memory (WRAML2)                   | 24                     | 27                    |
| General and face memory (NEPSY-II)        | 23                     | 28                    |
| General memory (WRAML2) replication (NDA) | 22                     | 24                    |
| Face memory (NEPSY-II) replication (NDA)  | 42                     | n.a.                  |
| Hierarchical clustering analysis          | 22                     | 26                    |
| <b>Brain imaging analysis</b>             |                        |                       |
| Group differences                         | 19                     | 24                    |
| Brain-behavior SVR analysis               | 17                     | 23                    |

n.a., sample not available

**Table S3. Linear mixed model results of general memory (WRAML2).**

|                                                | <i>b</i>    | <i>se</i>   | <i>t</i>    | <i>p</i>     | Model                 |             |                  |
|------------------------------------------------|-------------|-------------|-------------|--------------|-----------------------|-------------|------------------|
|                                                |             |             |             |              | <i>R</i> <sup>2</sup> | <i>F</i>    | <i>p</i>         |
| <b>Group (ASD vs. TD)</b>                      | <b>4.86</b> | <b>1.59</b> | <b>3.06</b> | <b>0.002</b> | <b>0.14</b>           | <b>6.04</b> | <b>&lt;0.001</b> |
| <b>Retrieval type (Recall vs. Recognition)</b> | 1.25        | 1.55        | 0.81        | 0.420        |                       |             |                  |
| <b>Type of material (Verbal vs. Visual)</b>    | 0.19        | 1.17        | 0.17        | 0.848        |                       |             |                  |
| <b>Delay interval (Short vs. Long)</b>         | 1.11        | 1.55        | 0.71        | 0.475        |                       |             |                  |
| <b>Group × Retrieval type</b>                  | -0.70       | 0.96        | -0.73       | 0.468        |                       |             |                  |
| <b>Group × Type of material</b>                | -1.07       | 0.73        | -1.47       | 0.144        |                       |             |                  |
| <b>Group × Delay interval</b>                  | -0.55       | 0.96        | -0.56       | 0.579        |                       |             |                  |

**Table S4. ANOVA results of general and face memory (NEPSY-II).**

|                                                | <i>F</i>     | <i>df</i>   | $\eta^2_p$  | <i>p</i>         |
|------------------------------------------------|--------------|-------------|-------------|------------------|
| <b>Group (ASD vs. TD)</b>                      | <b>20.22</b> | <b>1,49</b> | <b>0.29</b> | <b>&lt;0.001</b> |
| <b>Content domain (General vs. Face)</b>       | 1.98         | 1,49        | 0.04        | 0.166            |
| <b>Delay interval (Short vs. Long)</b>         | 0.45         | 1,49        | 0.01        | 0.508            |
| <b>Group × Content domain</b>                  | 0.44         | 1,49        | 0.01        | 0.510            |
| <b>Group × Delay interval</b>                  | 0.29         | 1,49        | 0.01        | 0.595            |
| <b>Content domain × Delay interval</b>         | 1.59         | 1,49        | 0.03        | 0.214            |
| <b>Group × Content domain × Delay interval</b> | 2.43         | 1,49        | 0.05        | 0.126            |

**Table S5. Correlation between memory measures in the ASD group.**

|                              | Immediate verbal recall | Immediate visual recall | Delayed verbal recall | Delayed verbal recognition | Delayed visual recognition | Immediate design recognition | Delayed design recognition | Immediate face recognition | Delayed face recognition |
|------------------------------|-------------------------|-------------------------|-----------------------|----------------------------|----------------------------|------------------------------|----------------------------|----------------------------|--------------------------|
| Immediate verbal recall      | 1                       | <b>0.57</b>             | <b>0.93</b>           | <b>0.88</b>                | <b>0.59</b>                | <b>0.53</b>                  | <b>0.55</b>                | 0.06                       | -0.08                    |
| Immediate visual recall      |                         | 1                       | <b>0.63</b>           | <b>0.48</b>                | <b>0.82</b>                | <b>0.54</b>                  | <b>0.63</b>                | 0.20                       | -0.13                    |
| Delayed verbal recall        |                         |                         | 1                     | <b>0.89</b>                | <b>0.61</b>                | <b>0.59</b>                  | <b>0.61</b>                | 0.14                       | -0.03                    |
| Delayed verbal recognition   |                         |                         |                       | 1                          | <b>0.46</b>                | <b>0.52</b>                  | <b>0.56</b>                | -0.09                      | -0.16                    |
| Delayed visual recognition   |                         |                         |                       |                            | 1                          | <b>0.58</b>                  | <b>0.64</b>                | 0.25                       | -0.23                    |
| Immediate design recognition |                         |                         |                       |                            |                            | 1                            | <b>0.81</b>                | 0                          | -0.22                    |
| Delayed design recognition   |                         |                         |                       |                            |                            |                              | 1                          | -0.04                      | -0.32                    |
| Immediate face recognition   |                         |                         |                       |                            |                            |                              |                            | 1                          | <b>0.58</b>              |
| Delayed face recognition     |                         |                         |                       |                            |                            |                              |                            |                            | 1                        |

Significant correlation coefficient are shown in bold.

**Table S6. Correlation between memory measures in the TD group.**

|                              | Immediate verbal recall | Immediate visual recall | Delayed verbal recall | Delayed verbal recognition | Delayed visual recognition | Immediate design recognition | Delayed design recognition | Immediate face recognition | Delayed face recognition |
|------------------------------|-------------------------|-------------------------|-----------------------|----------------------------|----------------------------|------------------------------|----------------------------|----------------------------|--------------------------|
| Immediate verbal recall      | 1                       | 0.25                    | <b>0.82</b>           | <b>0.49</b>                | <b>0.51</b>                | <b>0.47</b>                  | <b>0.53</b>                | 0.04                       | 0.11                     |
| Immediate visual recall      |                         | 1                       | 0.33                  | 0.13                       | <b>0.70</b>                | 0.15                         | 0.27                       | 0.20                       | <b>0.48</b>              |
| Delayed verbal recall        |                         |                         | 1                     | <b>0.68</b>                | <b>0.48</b>                | 0.36                         | 0.33                       | 0.22                       | 0.27                     |
| Delayed verbal recognition   |                         |                         |                       | 1                          | <b>0.47</b>                | 0.33                         | 0.27                       | 0.15                       | 0.11                     |
| Delayed visual recognition   |                         |                         |                       |                            | 1                          | 0.37                         | <b>0.46</b>                | <b>0.42</b>                | <b>0.50</b>              |
| Immediate design recognition |                         |                         |                       |                            |                            | 1                            | <b>0.74</b>                | -0.11                      | 0.01                     |
| Delayed design recognition   |                         |                         |                       |                            |                            |                              | 1                          | -0.16                      | 0.16                     |
| Immediate face recognition   |                         |                         |                       |                            |                            |                              |                            | 1                          | <b>0.53</b>              |
| Delayed face recognition     |                         |                         |                       |                            |                            |                              |                            |                            | 1                        |

Significant correlation coefficient are shown in bold.

**Table S7. 19 validation indices from hierarchical clustering analysis in the ASD group.**

|                   | <b>1</b>     | <b>2</b>     | <b>3</b>    | <b>4</b>    | <b>5</b>    | <b>6</b> | <b>7</b>    | <b>8</b>    |
|-------------------|--------------|--------------|-------------|-------------|-------------|----------|-------------|-------------|
| <b>kl</b>         | n.a.         | <b>2.34</b>  | 1.48        | 1.41        | 2.22        | 1.04     | 1.31        | 1.80        |
| <b>ch</b>         | n.a.         | 6.61         | 6.36        | 6.80        | 7.89        | 7.39     | 7.97        | <b>9.96</b> |
| <b>hartigan</b>   | n.a.         | 4.23         | 3.77        | 3.74        | 1.99        | 2.61     | 3.67        | <b>Inf</b>  |
| <b>cindex</b>     | n.a.         | 0.69         | 0.56        | <b>0.37</b> | 0.74        | 0.71     | 0.86        | 1           |
| <b>db</b>         | n.a.         | 0.81         | 0.92        | 0.70        | 0.53        | 0.41     | 0.26        | <b>0.25</b> |
| <b>silhouette</b> | n.a.         | 0.41         | 0.32        | 0.39        | 0.54        | 0.68     | <b>0.84</b> | 0.83        |
| <b>duda</b>       | 0.52         | 0.55         | 0.37        | <b>4.72</b> | 10.60       | 11.37    | 5.30        | 28.11       |
| <b>pseudot2</b>   | 6.61         | 4.10         | 3.42        | <b>0</b>    | 0           | 0        | -0.81       | 0           |
| <b>ratkowsky</b>  | n.a.         | 0.40         | <b>0.43</b> | 0.42        | 0.41        | 0.38     | 0.37        | 0.35        |
| <b>ball</b>       | 105.69       | <b>27.18</b> | 11.29       | 5.20        | 2.38        | 1.32     | 0.61        | 0.19        |
| <b>ptbiserial</b> | n.a.         | <b>0.87</b>  | 0.66        | 0.64        | 0.66        | 0.60     | 0.55        | 0.34        |
| <b>gap</b>        | <b>-0.30</b> | -0.87        | -2.24       | -2.70       | -2.69       | -3.18    | -3.50       | -4.89       |
| <b>mcclain</b>    | n.a.         | <b>0.37</b>  | 1.52        | 2.48        | 2.72        | 3.38     | 4.36        | 12.12       |
| <b>gamma</b>      | n.a.         | <b>1</b>     | 0.85        | 0.91        | 1           | 1        | 1           | 1           |
| <b>gplus</b>      | n.a.         | <b>0</b>     | 0.53        | 0.22        | 0           | 0        | 0           | 0           |
| <b>tau</b>        | n.a.         | <b>8.56</b>  | 6.17        | 4.56        | 4.31        | 3.56     | 2.75        | 0.97        |
| <b>dunn</b>       | n.a.         | 1.18         | 0.89        | 0.93        | <b>1.39</b> | 1.04     | 1.22        | 1.27        |
| <b>sdindex</b>    | n.a.         | 0.81         | 0.84        | 0.73        | <b>0.56</b> | 0.65     | 0.64        | 0.85        |
| <b>sdbw</b>       | n.a.         | 0.55         | 0.39        | 0.30        | 0.13        | 0.06     | 0.02        | <b>0.01</b> |

Value with optimal cluster solution is in bold for each index.

**Table S8. 19 validation indices from hierarchical clustering analysis in TD group.**

|                   | <b>1</b>    | <b>2</b>     | <b>3</b> | <b>4</b>     | <b>5</b> | <b>6</b>    | <b>7</b> | <b>8</b>    |
|-------------------|-------------|--------------|----------|--------------|----------|-------------|----------|-------------|
| <b>kl</b>         | n.a.        | 2.01         | 0.69     | <b>2.09</b>  | 1.02     | 1.55        | 1.14     | 1.42        |
| <b>ch</b>         | n.a.        | 3.41         | 2.79     | 3.55         | 3.43     | 3.78        | 3.78     | <b>4.18</b> |
| <b>hartigan</b>   | n.a.        | 2.08         | 3.74     | 2.07         | 2.79     | 2.07        | 2.90     | <b>Inf</b>  |
| <b>cindex</b>     | n.a.        | 0.59         | 0.60     | <b>0.52</b>  | 0.73     | 0.86        | 0.88     | 1           |
| <b>db</b>         | n.a.        | 1.42         | 1.11     | 0.93         | 0.74     | 0.54        | 0.41     | <b>0.29</b> |
| <b>silhouette</b> | n.a.        | 0.20         | 0.17     | 0.25         | 0.34     | 0.53        | 0.70     | <b>0.85</b> |
| <b>duda</b>       | 0.67        | 0.48         | 0.49     | <b>1.774</b> | 4.24     | 6.72        | 7.83     | 11.37       |
| <b>pseudot2</b>   | 3.41        | 2.13         | 3.14     | <b>-0.43</b> | 0        | 0           | 0        | 0           |
| <b>ratkowsky</b>  | n.a.        | 0.31         | 0.35     | <b>0.38</b>  | 0.37     | 0.36        | 0.35     | 0.3         |
| <b>ball</b>       | 132.99      | <b>44.70</b> | 22.98    | 10.62        | 6.00     | 3.04        | 1.54     | 0.55        |
| <b>ptbiserial</b> | n.a.        | 0.60         | 0.59     | <b>0.69</b>  | 0.62     | 0.63        | 0.55     | 0.43        |
| <b>gap</b>        | <b>0.91</b> | 1.71         | 0.61     | 0.40         | 0.55     | 0.64        | 1.76     | n.a.        |
| <b>mcclain</b>    | n.a.        | <b>0.99</b>  | 1.57     | 3.38         | 5.17     | 6.49        | 9.56     | 18.06       |
| <b>gamma</b>      | n.a.        | 0.73         | 0.72     | 0.96         | 0.97     | <b>1</b>    | 1        | 1           |
| <b>gplus</b>      | n.a.        | 1.19         | 1.14     | 0.11         | 0.06     | <b>0</b>    | 0        | 0           |
| <b>tau</b>        | n.a.        | <b>6.50</b>  | 5.72     | 4.78         | 3.44     | 2.75        | 1.89     | 0.97        |
| <b>dunn</b>       | n.a.        | 0.78         | 0.82     | 0.96         | 0.83     | 1.04        | 1.08     | <b>1.20</b> |
| <b>sdindex</b>    | n.a.        | 0.74         | 0.62     | 0.54         | 0.47     | <b>0.42</b> | 0.42     | 0.44        |
| <b>sdbw</b>       | n.a.        | 0.68         | 0.53     | 0.41         | 0.28     | 0.13        | 0.06     | <b>0.02</b> |

Value with optimal cluster solution is in bold for each index.

**Table S9. Brain regions that showed hyper-functional connectivity of the left and right hippocampus in ASD, compared to TD control, group.**

| Region                              | MNI coordinates |     |     | Peak (F) | Cluster size (voxel) | Cohen's $f^2$ |
|-------------------------------------|-----------------|-----|-----|----------|----------------------|---------------|
|                                     | x               | y   | z   |          |                      |               |
| <b>L Hippocampus</b>                |                 |     |     |          |                      |               |
| L/R Thalamus/Hippocampus            | 0               | -28 | 8   | 5.13     | 638                  | 0.64          |
| R Fusiform/Cerebellum/Lingual Gyrus | 38              | -64 | -18 | 4.54     | 595                  | 0.50          |
| L Fusiform/Cerebellum/Lingual Gyrus | -40             | -68 | -18 | 4.47     | 372                  | 0.49          |
| L Cerebellum                        | 10              | -72 | -28 | 4.02     | 229                  | 0.39          |
| <b>R Hippocampus</b>                |                 |     |     |          |                      |               |
| R Fusiform/Cerebellum               | 26              | -50 | -24 | 4.46     | 532                  | 0.49          |
| R Cerebellum/Thalamus               | 4               | -30 | 6   | 4.13     | 224                  | 0.42          |
| /Posterior Cingulate Cortex (PCC)   |                 |     |     |          |                      |               |
| L Cerebellum/Fusiform               | -44             | -76 | -20 | 4.09     | 249                  | 0.41          |
| L Cerebellum                        | -10             | -90 | -20 | 3.99     | 171                  | 0.39          |
| L Supramarginal Gyrus               | -48             | -50 | 56  | 3.89     | 268                  | 0.37          |
| /Inferior Parietal Lobe             |                 |     |     |          |                      |               |
| L/R Anterior Cingulate Cortex       | 6               | 46  | 4   | 3.60     | 143                  | 0.32          |
| /Medial Prefrontal Cortex           |                 |     |     |          |                      |               |
| L/R Anterior Cingulate Cortex       | 4               | 46  | 24  | 3.40     | 146                  | 0.28          |
| /Medial Prefrontal Cortex           |                 |     |     |          |                      |               |

L, Left; R, Right.



**Table S10. SVR prediction of general and face memory with hippocampal or PCC connectivity.**

|                                         | General |                        | Face  |                        |
|-----------------------------------------|---------|------------------------|-------|------------------------|
|                                         | $p$     | $p_{\text{corrected}}$ | $p$   | $p_{\text{corrected}}$ |
| <b>Hippocampus</b>                      |         |                        |       |                        |
| ASD                                     | 0.004   | <b>0.016</b>           | 0.575 | >0.99                  |
| TD                                      | 0.985   | >0.99                  | 0.195 | 0.780                  |
| <b>Posterior cingulate cortex (PCC)</b> |         |                        |       |                        |
| ASD                                     | 0.048   | 0.192                  | 0.004 | <b>0.016</b>           |
| TD                                      | 0.470   | >0.99                  | 0.314 | >0.99                  |

Bonferroni correction:  $p_{\text{corrected}} = p_{\text{original}} \times 4$  (2 ROIs  $\times$  2 behaviors)

**Table S11. Definition of regions of interest (ROI).**

| ROI                                | MNI coordinates |     |     | References                            |
|------------------------------------|-----------------|-----|-----|---------------------------------------|
|                                    | x               | y   | z   |                                       |
| L Hippocampus                      | -24             | -14 | -20 | Qin et al. (2016); Kahn et al. (2008) |
| R Hippocampus                      | 24              | -14 | -20 |                                       |
| R Posterior cingulate cortex (PCC) | 4               | -38 | 32  | Patriquin et al. (2016)               |
| <b>Other control ROIs</b>          |                 |     |     |                                       |
| L Prefrontal cortex (PFC)          | -46             | 20  | 44  | Cai et al. (2016)                     |
| R PFC                              | 50              | 18  | 44  |                                       |
| L Posterior parietal cortex (PPC)  | -40             | -56 | 44  |                                       |
| R PPC                              | 48              | -52 | 50  |                                       |
| L Fusiform face area (FFA)         | -35             | -49 | -14 | Berman et al. (2009)                  |
| R FFA                              | 35              | -49 | -14 |                                       |
| L Amygdala (AMY)                   | -20             | -2  | -18 | Gur et al. (2002)                     |
| R AMY                              | 20              | -2  | -18 |                                       |
| L Temporoparietal junction (TPJ)   | -63             | -57 | 16  | Schurz et al. (2014)                  |
| R TPJ                              | 54              | -55 | 26  | Mars et al. (2012)                    |

L, Left; R, Right.

**Table S12. Brain regions that showed hyper-functional connectivity of the PCC in ASD, compared to TD control, group.**

| Region                                                           | MNI coordinates |     |     | Peak<br>( <i>F</i> ) | Cluster<br>size<br>(voxel) | Cohen's <i>f</i> <sup>2</sup> |
|------------------------------------------------------------------|-----------------|-----|-----|----------------------|----------------------------|-------------------------------|
|                                                                  | x               | y   | z   |                      |                            |                               |
| <b>Posterior cingulate cortex (PCC)</b>                          |                 |     |     |                      |                            |                               |
| L Cerebellum                                                     | -30             | -38 | -50 | 5.29                 | 132                        | 0.68                          |
| L/R Caudate                                                      | -4              | 0   | 0   | 4.78                 | 261                        | 0.56                          |
| L Hippocampus/Amygdala<br>/PHG/Fusiform/Cerebellum               | -16             | -40 | -18 | 4.76                 | 940                        | 0.55                          |
| R Cerebellum                                                     | 40              | -50 | -54 | 4.58                 | 246                        | 0.51                          |
| L Frontal Orbital Cortex                                         | -26             | 30  | -20 | 4.48                 | 153                        | 0.49                          |
| L Cerebellum                                                     | -16             | -76 | -56 | 4.39                 | 199                        | 0.47                          |
| R Middle/Superior Occipital Gyrus                                | 28              | -98 | 6   | 4.15                 | 162                        | 0.42                          |
| R Fusiform/Inferior Temporal Gyrus<br>/Middle Temporal Gyrus/PHG | 40              | -36 | -16 | 4.09                 | 866                        | 0.41                          |
| R Cerebellum/Fusiform/PHG                                        | 14              | -38 | -18 | 4.08                 | 213                        | 0.41                          |

L, Left; R, Right; PHG, Parahippocampal gyrus.

## IV. Supplementary Figures

| Episodic memory         |                                 |                                 |                                                 |                                                                  |                                                           |                              |                            |                            |                          |
|-------------------------|---------------------------------|---------------------------------|-------------------------------------------------|------------------------------------------------------------------|-----------------------------------------------------------|------------------------------|----------------------------|----------------------------|--------------------------|
| <b>Content domain</b>   | General (WRAML2)                |                                 |                                                 |                                                                  | General (NEPSY-II)                                        |                              | Face (NEPSY-II)            |                            |                          |
| <b>Delay interval</b>   | Short                           |                                 | Long                                            |                                                                  | Short                                                     | Long                         | Short                      | Long                       |                          |
| <b>Retrieval type</b>   | Recall                          |                                 | Recognition                                     |                                                                  | Recognition                                               |                              | Recognition                |                            |                          |
| <b>Type of material</b> | Verbal                          | Visual                          | Verbal                                          | Verbal                                                           | Visual                                                    | Visual                       |                            | Visual                     |                          |
| <b>Subtest</b>          | Verbal learning<br>Story memory | Design memory<br>Picture memory | Delayed verbal learning<br>Delayed story memory | Delayed verbal learning recognition<br>Delayed story recognition | Delayed design recognition<br>Delayed picture recognition | Memory for designs           | Delayed memory for designs | Memory for faces           | Delayed memory for faces |
| <b>Subscore</b>         | Immediate verbal recall         | Immediate visual recall         | Delayed verbal recall                           | Delayed verbal recognition                                       | Delayed visual recognition                                | Immediate design recognition | Delayed design recognition | Immediate face recognition | Delayed face recognition |

**Figure S1. Episodic memory assessments using WRAML2 and NEPSY-II.** Colors represent different memory dimensions and subtests. A total of nine memory subscores (last row) were included in the current study.

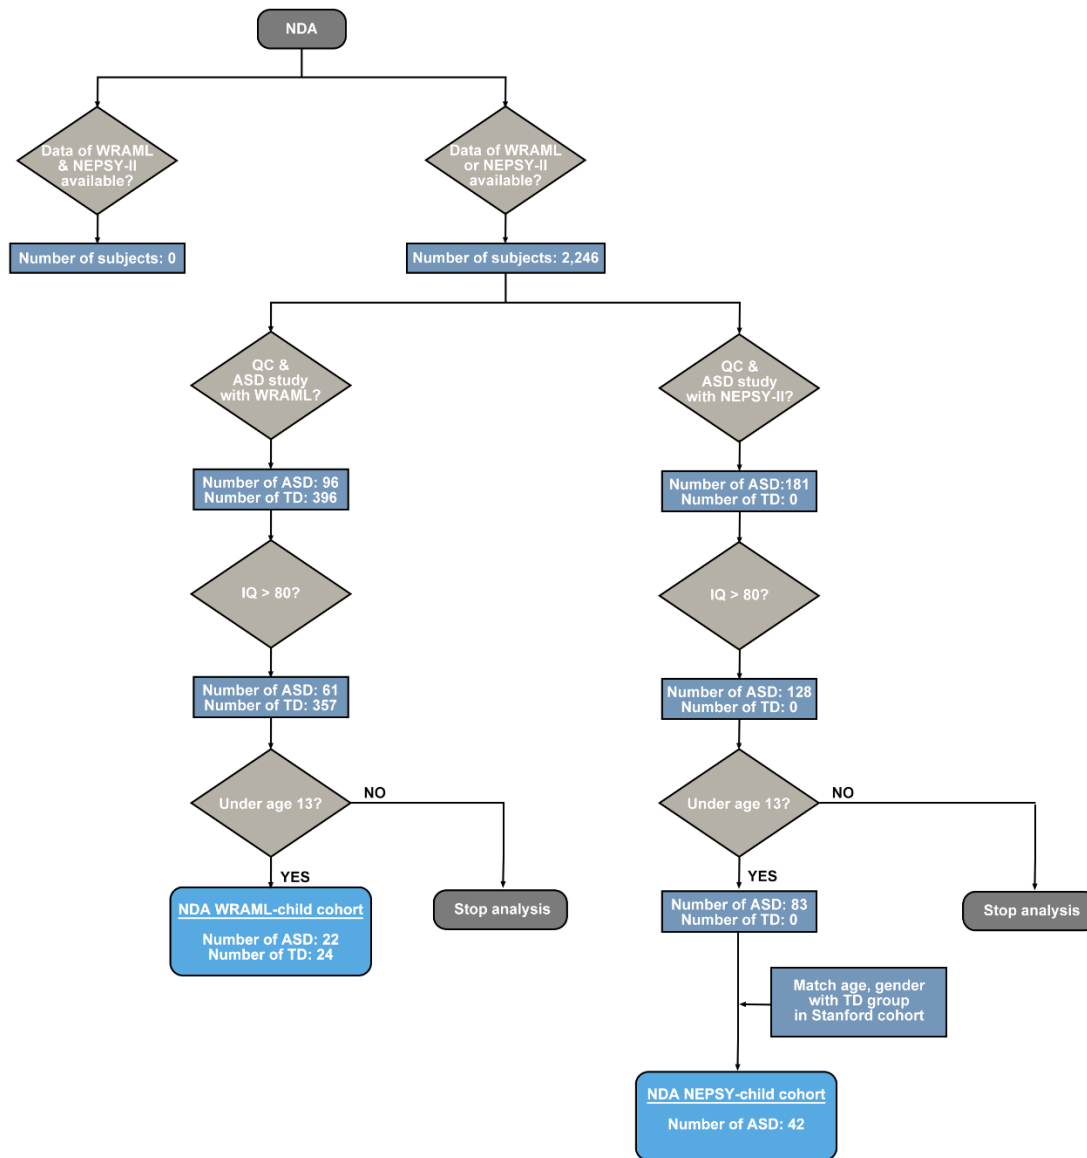

**Figure S2. Flow chart showing the search of an open-source autism spectrum disorder dataset.** The search of the National Institute of Mental Health Data Archive (NDA) generated two cohorts with available WRAML2 or NEPSY-II memory measures. ASD = Children with Autism Spectrum Disorder; TD = Typically Developing Children; QC, data quality control.

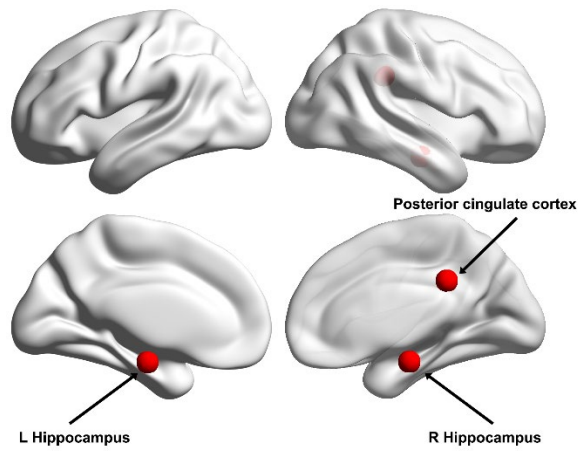

**Figure S3. Surface rendering of regions of interest (ROI) used in functional connectivity analysis.** MNI coordinates: L Hippocampus (-24 -14 -20), R Hippocampus (24 -14 -20), and Posterior cingulate cortex (4, -38, 32).

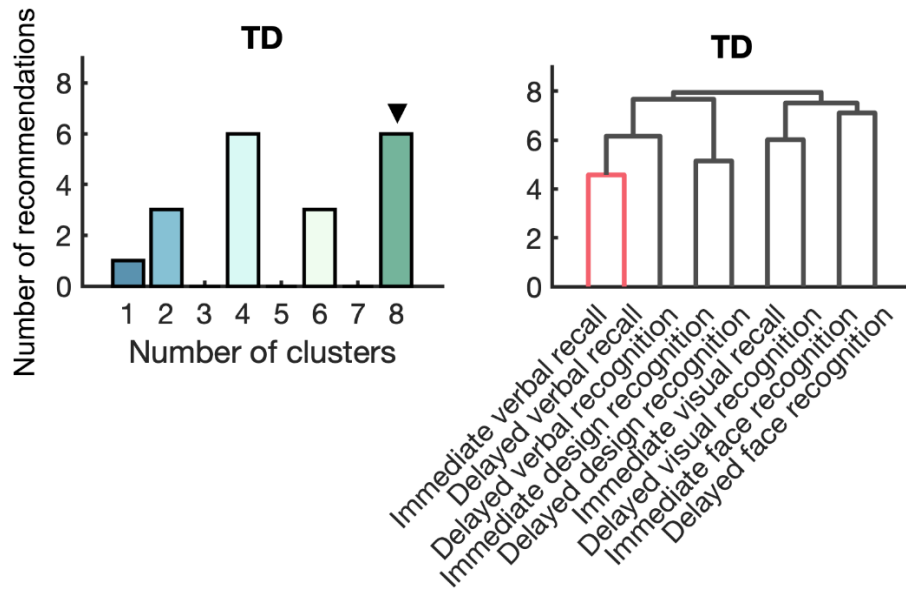

**Figure S4. Dendrogram from hierarchical clustering of episodic memory in TD children.** The color represents the recommended clusters of eight. Only immediate and delayed verbal recall measures belong to one cluster (pink link). All other memory measures belong to separate clusters with each other.

## V. Supplementary References

1. Wechsler D (1999): Abbreviated scale of intelligence. *San Antonio, TX: Psychological Corporation*.
2. Sheslow D, Adams W (2003): *Wide range assessment of memory and learning (WRAML)*. NCS Pearson Bloomington, MN.
3. Brooks BL, Sherman EM, Strauss E (2009): NEPSY-II: a developmental neuropsychological assessment. *Child Neuropsychology*. 16:80-101.
4. Glover GH, Lai S (1998): Self-navigated spiral fMRI: interleaved versus single-shot. *Magn Reson Med*. 39:361-368.
5. Cai W, Chen T, Ryali S, Kochalka J, Li CS, Menon V (2016): Causal Interactions Within a Frontal-Cingulate-Parietal Network During Cognitive Control: Convergent Evidence from a Multisite-Multitask Investigation. *Cereb Cortex*. 26:2140-2153.
6. Berman MG, Park J, Gonzalez R, Polk TA, Gehrke A, Knaffla S, et al. (2010): Evaluating functional localizers: the case of the FFA. *Neuroimage*. 50:56-71.
7. Gur RE, McGrath C, Chan RM, Schroeder L, Turner T, Turetsky BI, et al. (2002): An fMRI study of facial emotion processing in patients with schizophrenia. *Am J Psychiatry*. 159:1992-1999.
8. Mars RB, Neubert FX, Noonan MP, Sallet J, Toni I, Rushworth MF (2012): On the relationship between the "default mode network" and the "social brain". *Front Hum Neurosci*. 6:189.
9. Abbasy S, Shahraki F, Haghghatfard A, Qazvini MG, Rafiei ST, Noshadirad E, et al. (2018): Neuregulin1 types mRNA level changes in autism spectrum disorder, and is associated with deficit in executive functions. *EBioMedicine*. 37:483-488.
10. Alloway TP, Seed T, Tewolde F (2016): An investigation of cognitive overlap in working memory profiles in children with developmental disorders. *International Journal of Educational Research*. 75:1-6.
11. Almeida TS, Lamb ME, Weisblatt EJ (2019): Effects of Delay, Question Type, and Socioemotional Support on Episodic Memory Retrieval by Children with Autism Spectrum Disorder. *J Autism Dev Disord*. 49:1111-1130.
12. Anns S, Gaigg SB, Hampton JA, Bowler DM, Boucher J (2020): Declarative Memory and Structural Language Impairment in Autistic Children and Adolescents. *Autism Res*. 13:1947-1958.
13. Bigham S, Boucher J, Mayes A, Anns S (2010): Assessing recollection and familiarity in autistic spectrum disorders: methods and findings. *J Autism Dev Disord*. 40:878-889.
14. Boucher J, Warrington EK (1976): Memory deficits in early infantile autism: some similarities to the amnesic syndrome. *Br J Psychol*. 67:73-87.
15. Boucher J (1981): Memory for recent events in autistic children. *J Autism Dev Disord*. 11:293-301.
16. Boucher J, Lewis V (1992): Unfamiliar face recognition in relatively able autistic children. *J Child Psychol Psychiatry*. 33:843-859.
17. Brezis RS, Galili T, Wong T, Piggot JI (2014): Impaired social processing in autism and its reflections in memory: a deeper view of encoding and retrieval processes. *J Autism Dev Disord*. 44:1183-1192.
18. Buitelaar JK, van der Wees M, Swaab-Barneveld H, van der Gaag RJ (1999): Verbal memory and Performance IQ predict theory of mind and emotion recognition ability in children



with autistic spectrum disorders and in psychiatric control children. *J Child Psychol Psychiatry*. 40:869-881.

19. Chen SF, Chien YL, Wu CT, Shang CY, Wu YY, Gau SS (2016): Deficits in executive functions among youths with autism spectrum disorders: an age-stratified analysis. *Psychol Med*. 46:1625-1638.

20. Cook KM, You X, Cherry JB, Merchant JS, Skapek M, Powers MD, et al. (2021): Neural correlates of schema-dependent episodic memory and association with behavioral flexibility in autism spectrum disorders and typical development. *J Neurodev Disord*. 13:35.

21. Corbett BA, Newsom C, Key AP, Qualls LR, Edmiston EK (2014): Examining the relationship between face processing and social interaction behavior in children with and without autism spectrum disorder. *J Neurodev Disord*. 6:35.

22. Croydon A, Pimperton H, Ewing L, Duchaine BC, Pellicano E (2014): The Cambridge Face Memory Test for Children (CFMT-C): a new tool for measuring face recognition skills in childhood. *Neuropsychologia*. 62:60-67.

23. Cui J, Gao D, Chen Y, Zou X, Wang Y (2010): Working memory in early-school-age children with Asperger's syndrome. *J Autism Dev Disord*. 40:958-967.

24. Diehl JJ, Bennetto L, Young EC (2006): Story recall and narrative coherence of high-functioning children with autism spectrum disorders. *J Abnorm Child Psychol*. 34:87-102.

25. Farrant A, Blades M, Boucher J (1998): Source monitoring by children with autism. *J Autism Dev Disord*. 28:43-50.

26. Farrant A, Blades M, Boucher J (1999): Recall readiness in children with autism. *J Autism Dev Disord*. 29:359-366.

27. Fedor J, Lynn A, Foran W, DiCicco-Bloom J, Luna B, O'Hearn K (2018): Patterns of fixation during face recognition: Differences in autism across age. *Autism*. 22:866-880.

28. Gabig CS (2008): Verbal working memory and story retelling in school-age children with autism. *Lang Speech Hear Serv Sch*. 39:498-511.

29. Geurts HM, Verte S, Oosterlaan J, Roeyers H, Sergeant JA (2004): How specific are executive functioning deficits in attention deficit hyperactivity disorder and autism? *J Child Psychol Psychiatry*. 45:836-854.

30. Grainger C, Williams DM, Lind SE (2017): Recognition memory and source memory in autism spectrum disorder: A study of the intention superiority and enactment effects. *Autism*. 21:812-820.

31. Grainger C, Williams DM, Lind SE (2016): Judgment of Learning Accuracy in High-functioning Adolescents and Adults with Autism Spectrum Disorder. *J Autism Dev Disord*. 46:3570-3582.

32. Greimel E, Nehr Korn B, Fink GR, Kukolja J, Kohls G, Muller K, et al. (2012): Neural mechanisms of encoding social and non-social context information in autism spectrum disorder. *Neuropsychologia*. 50:3440-3449.

33. Gunji A, Goto T, Kita Y, Sakuma R, Kokubo N, Koike T, et al. (2013): Facial identity recognition in children with autism spectrum disorders revealed by P300 analysis: a preliminary study. *Brain Dev*. 35:293-298.

34. Hartley C, Bird LA, Monaghan P (2019): Investigating the relationship between fast mapping, retention, and generalisation of words in children with autism spectrum disorder and typical development. *Cognition*. 187:126-138.

35. Hashimoto T, Yokota S, Matsuzaki Y, Kawashima R (2021): Intrinsic hippocampal functional connectivity underlying rigid memory in children and adolescents with autism spectrum disorder: A case-control study. *Autism*.13623613211004058.
36. Henderson HA, Zahka NE, Kojkowski NM, Inge AP, Schwartz CB, Hileman CM, et al. (2009): Self-referenced memory, social cognition, and symptom presentation in autism. *J Child Psychol Psychiatry*. 50:853-861.
37. Henry LA, Crane L, Nash G, Hobson Z, Kirke-Smith M, Wilcock R (2017): Verbal, Visual, and Intermediary Support for Child Witnesses with Autism During Investigative Interviews. *J Autism Dev Disord*. 47:2348-2362.
38. Jiang YV, Palm BE, DeBolt MC, Goh YS (2015): High-precision visual long-term memory in children with high-functioning autism. *J Abnorm Psychol*. 124:447-456.
39. Kurz EM, Conzelmann A, Barth GM, Hepp L, Schenk D, Renner TJ, et al. (2019): Signs of enhanced formation of gist memory in children with autism spectrum disorder - a study of memory functions of sleep. *J Child Psychol Psychiatry*. 60:907-916.
40. Li S, Hu J, Chang R, Li Q, Wan P, Liu S (2021): Eye Movements of Spatial Working Memory Encoding in Children with and without Autism: Chunking Processing and Reference Preference. *Autism Res*. 14:897-910.
41. Lind SE, Bowler DM (2009): Recognition memory, self-other source memory, and theory-of-mind in children with autism spectrum disorder. *J Autism Dev Disord*. 39:1231-1239.
42. Lind SE, Bowler DM, Raber J (2014): Spatial navigation, episodic memory, episodic future thinking, and theory of mind in children with autism spectrum disorder: evidence for impairments in mental simulation? *Front Psychol*. 5:1411.
43. Lind SE, Williams DM, Nicholson T, Grainger C, Carruthers P (2020): The self-reference effect on memory is not diminished in autism: Three studies of incidental and explicit self-referential recognition memory in autistic and neurotypical adults and adolescents. *J Abnorm Psychol*. 129:224-236.
44. Lopez B, Leekam SR, Arts GR (2008): How central is central coherence? Preliminary evidence on the link between conceptual and perceptual processing in children with autism. *Autism*. 12:159-171.
45. Loth E, Gomez JC, Happe F (2011): Do high-functioning people with autism spectrum disorder spontaneously use event knowledge to selectively attend to and remember context-relevant aspects in scenes? *J Autism Dev Disord*. 41:945-961.
46. Lucas R, Norbury CF (2014): Orthography facilitates vocabulary learning for children with autism spectrum disorders (ASD). *Q J Exp Psychol (Hove)*. 67:1317-1334.
47. Loveland KA, Bachevalier J, Pearson DA, Lane DM (2008): Fronto-limbic functioning in children and adolescents with and without autism. *Neuropsychologia*. 46:49-62.
48. Lynn AC, Padmanabhan A, Simmonds D, Foran W, Hallquist MN, Luna B, et al. (2018): Functional connectivity differences in autism during face and car recognition: underconnectivity and atypical age-related changes. *Dev Sci*. 21.
49. Ma W, Sai L, Tay C, Du Y, Jiang J, Ding XP (2019): Children with Autism Spectrum Disorder's Lying is Correlated with Their Working Memory But Not Theory of Mind. *J Autism Dev Disord*. 49:3364-3375.
50. Macizo P, Soriano MF, Paredes N (2016): Phonological and Visuospatial Working Memory in Autism Spectrum Disorders. *J Autism Dev Disord*. 46:2956-2967.
51. Maister L, Plaisted-Grant KC (2011): Time perception and its relationship to memory in Autism Spectrum Conditions. *Dev Sci*. 14:1311-1322.

52. Maister L, Simons JS, Plaisted-Grant K (2013): Executive functions are employed to process episodic and relational memories in children with autism spectrum disorders. *Neuropsychology*. 27:615-627.
53. Mammarella IC, Cardillo R, Zocante L (2019): Differences in visuospatial processing in individuals with nonverbal learning disability or autism spectrum disorder without intellectual disability. *Neuropsychology*. 33:123-134.
54. Maski K, Holbrook H, Manoach D, Hanson E, Kapur K, Stickgold R (2015): Sleep Dependent Memory Consolidation in Children with Autism Spectrum Disorder. *Sleep*. 38:1955-1963.
55. Matsuura N, Ishitobi M, Arai S, Kawamura K, Asano M, Inohara K, et al. (2014): Distinguishing between autism spectrum disorder and attention deficit hyperactivity disorder by using behavioral checklists, cognitive assessments, and neuropsychological test battery. *Asian J Psychiatr*. 12:50-57.
56. Mattison M, Dando CJ, Ormerod TC (2018): Drawing the answers: Sketching to support free and probed recall by child witnesses and victims with autism spectrum disorder. *Autism*. 22:181-194.
57. McGregor KK, Rost G, Arenas R, Farris-Trimble A, Stiles D (2013): Children with ASD can use gaze in support of word recognition and learning. *J Child Psychol Psychiatry*. 54:745-753.
58. McPartland JC, Webb SJ, Keehn B, Dawson G (2011): Patterns of visual attention to faces and objects in autism spectrum disorder. *J Autism Dev Disord*. 41:148-157.
59. Millward C, Powell S, Messer D, Jordan R (2000): Recall for self and other in autism: children's memory for events experienced by themselves and their peers. *J Autism Dev Disord*. 30:15-28.
60. Minshew NJ, Goldstein G (1993): Is autism an amnesic disorder? Evidence from the California Verbal Learning Test. *Neuropsychology*. 7:209.
61. Mogensen RLH, Hedegaard MB, Olsen LR, Gebauer L (2020): Linking the Puzzle Pieces of the Past: A Study of Relational Memory in Children with Autism Spectrum Disorder. *Autism Res*. 13:1959-1969.
62. Molesworth CJ, Bowler DM, Hampton JA (2005): The prototype effect in recognition memory: intact in autism? *J Child Psychol Psychiatry*. 46:661-672.
63. Mooney LN, Nordahl CW, Solomon M, Ghetti S (2020): Children with ASD Show Impaired Item-Space Recollection, But Preserved Item-Color Recollection. *Autism Res*. 13:1985-1997.
64. Mottron L, Morasse K, Belleville S (2001): A study of memory functioning in individuals with autism. *J Child Psychol Psychiatry*. 42:253-260.
65. Narzisi A, Muratori F, Calderoni S, Fabbro F, Urgesi C (2013): Neuropsychological profile in high functioning autism spectrum disorders. *J Autism Dev Disord*. 43:1895-1909.
66. O'Hearn K, Schroer E, Minshew N, Luna B (2010): Lack of developmental improvement on a face memory task during adolescence in autism. *Neuropsychologia*. 48:3955-3960.
67. O'Hearn K, Larsen B, Fedor J, Luna B, Lynn A (2020): Representational similarity analysis reveals atypical age-related changes in brain regions supporting face and car recognition in autism. *Neuroimage*. 209:116322.
68. O'Shea AG, Fein DA, Cillessen AH, Klin A, Schultz RT (2005): Source memory in children with autism spectrum disorders. *Dev Neuropsychol*. 27:337-360.

69. Parron C, Da Fonseca D, Santos A, Moore DG, Monfardini E, Deruelle C (2008): Recognition of biological motion in children with autistic spectrum disorders. *Autism*. 12:261-274.
70. Phelan HL, Filliter JH, Johnson SA (2011): Brief report: memory performance on the California verbal learning test - children's version in Autism spectrum disorder. *J Autism Dev Disord*. 41:518-523.
71. Salmanian M, Tehrani-Doost M, Ghanbari-Motlagh M, Shahrivar Z (2012): Visual memory of meaningless shapes in children and adolescents with autism spectrum disorders. *Iran J Psychiatry*. 7:104-108.
72. Salmond CH, Ashburner J, Connelly A, Friston KJ, Gadian DG, Vargha-Khadem F (2005): The role of the medial temporal lobe in autistic spectrum disorders. *Eur J Neurosci*. 22:764-772.
73. Semino S, Zanobini M, Usai MC (2021): Visual memory profile in children with high functioning autism. *Appl Neuropsychol Child*. 10:26-36.
74. Souchay C, Wojcik DZ, Williams HL, Crathern S, Clarke P (2013): Recollection in adolescents with Autism Spectrum Disorder. *Cortex*. 49:1598-1609.
75. Southwick JS, Bigler ED, Froehlich A, DuBray MB, Alexander AL, Lange N, et al. (2011): Memory functioning in children and adolescents with autism. *Neuropsychology*. 25:702-710.
76. Tessier S, Lambert A, Scherzer P, Jemel B, Godbout R (2015): REM sleep and emotional face memory in typically-developing children and children with autism. *Biol Psychol*. 110:107-114.
77. Tewolde FG, Bishop DVM, Manning C (2018): Visual Motion Prediction and Verbal False Memory Performance in Autistic Children. *Autism Res*. 11:509-518.
78. Trontel HG, Duffield TC, Bigler ED, Abildskov TJ, Froehlich A, Prigge MB, et al. (2015): Mesial temporal lobe and memory function in autism spectrum disorder: an exploration of volumetric findings. *J Clin Exp Neuropsychol*. 37:178-192.
79. Trontel HG, Duffield TC, Bigler ED, Froehlich A, Prigge MB, Nielsen JA, et al. (2013): Fusiform correlates of facial memory in autism. *Behav Sci (Basel)*. 3:348-371.
80. Tsatsanis KD, Noens IL, Illmann CL, Pauls DL, Volkmar FR, Schultz RT, et al. (2011): Managing complexity: impact of organization and processing style on nonverbal memory in autism spectrum disorders. *J Autism Dev Disord*. 41:135-147.
81. Tyson K, Kelley E, Fein D, Orinstein A, Troyb E, Barton M, et al. (2014): Language and verbal memory in individuals with a history of autism spectrum disorders who have achieved optimal outcomes. *J Autism Dev Disord*. 44:648-663.
82. Verte S, Geurts HM, Roeyers H, Oosterlaan J, Sergeant JA (2005): Executive functioning in children with autism and Tourette syndrome. *Dev Psychopathol*. 17:415-445.
83. Wang Z, Jing J, Igarashi K, Fan L, Yang S, Li Y, et al. (2018): Executive function predicts the visuospatial working memory in autism spectrum disorder and attention-deficit/hyperactivity disorder. *Autism Res*. 11:1148-1156.
84. Williams DL, Goldstein G, Minshew NJ (2006): The profile of memory function in children with autism. *Neuropsychology*. 20:21-29.
85. Williams DL, Goldstein G, Minshew NJ (2006): Neuropsychologic functioning in children with autism: further evidence for disordered complex information-processing. *Child Neuropsychol*. 12:279-298.

86. Williams DL, Minshew NJ, Goldstein G, Mazefsky CA (2017): Long-term memory in older children/adolescents and adults with autism spectrum disorder. *Autism Res.* 10:1523-1532.
87. Wojcik DZ, Moulin CJ, Souchay C (2013): Metamemory in children with autism: exploring "feeling-of-knowing" in episodic and semantic memory. *Neuropsychology.* 27:19-27.
88. Wojcik DZ, Waterman AH, Lestie C, Moulin CJ, Souchay C (2014): Metacognitive judgments-of-learning in adolescents with autism spectrum disorder. *Autism.* 18:393-408.
89. Zaki SR, Johnson SA (2013): The role of gaze direction in face memory in autism spectrum disorder. *Autism Res.* 6:280-287.
90. Zhang M, Jiao J, Hu X, Yang P, Huang Y, Situ M, et al. (2020): Exploring the spatial working memory and visual perception in children with autism spectrum disorder and general population with high autism-like traits. *PLoS One.* 15:e0235552.
